1

# 1 **Virus evolution affected early COVID-19 spread**

2 Short Title: Evolution of COVID-19

3 Authors: Derek Corcoran<sup>1,2,3¶\*</sup>, Mark C. Urban<sup>1,3¶</sup>, Jill Wegrzyn<sup>1,4¶</sup>, Cory Merow<sup>1,2,3¶</sup>

4 Affiliation:

5 <sup>1</sup> Department of Ecology & Evolutionary Biology, University of Connecticut, Storrs,  
6 Connecticut, United States of America

7 <sup>2</sup> Eversource Energy Center, University of Connecticut, Storrs, Connecticut, United States of  
8 America

9 <sup>3</sup> Center of Biological Risk, University of Connecticut, Storrs, Connecticut, United States of  
10 America

11 <sup>4</sup> Computational Biology Core, University of Connecticut, Storrs, Connecticut, United States of  
12 America

13 \* Corresponding author

14 email: [derek.corcoran.barrios@gmail.com](mailto:derek.corcoran.barrios@gmail.com) (DC)

15 ¶ These authors contributed equally to this work.

2

16 **Keywords: SARS-2, climate, weather, UV, pandemic, spike protein, genomics, D614G**

17 Abstract:

18 As the SARS-Cov-2 virus spreads around the world afflicting millions of people, it has undergone  
19 divergent genetic mutations. Although most of these mutations are expected to be inconsequential, some mutations  
20 in the spike protein structure have been hypothesized to affect the critical stage at which the virus invades human  
21 cells, which could affect transmission probability and disease expression. If true, then we expect an increased  
22 growth rate of reported COVID-19 cases in regions dominated by viruses with these altered proteins. We modeled  
23 early global infection dynamics based on clade assignment along with other demographic and meteorological factors  
24 previously found to be important. Clade, but not variant D614G which has been associated with increased viral load,  
25 enhanced our ability to describe early COVID-19 growth dynamics. Including clade identity in models significantly  
26 improved predictions over earlier work based only on weather and demographic variables. In particular, higher  
27 proportions of clade 19A and 19B were negatively correlated with COVID-19 growth rate, whereas higher  
28 proportions of 20A and 20C were positively correlated with growth rate. A strong interaction between the  
29 prevalence of clade 20C and relative humidity suggests that the impact of clade identity might be more important  
30 when coupled with certain weather conditions. In particular, 20C and 20A generate the highest growth rates when  
31 coupled with low humidity. Projections based on data through April 2020 suggest that, without intervention,  
32 COVID-19 has the potential to grow more quickly in regions dominated by the 20A and 20C clades, including most  
33 of South and North America.

## 34 **Introduction**

35 Novel Coronavirus Disease 2019 (COVID-19) is causing widespread morbidity and mortality globally [1,2]. The  
36 SARS-Cov-2 virus responsible for this disease has now infected 22.5 million people through August 2020 [3]. As  
37 the virus has spread around the world, it has mutated into divergent clades with different prevalence in different  
38 geographic regions [4,5], although all five of the clades described today are circulating around the globe. Clades  
39 known as 19A and 19B emerged in Wuhan and clade 20A emerged from 19A and was prominent in the European  
40 outbreak in March. Both 20B and 20C are considered subclades of 20A [6]. To date, we do not know if these  
41 geographically dispersed clades are associated with altered disease dynamics. Yet, the models used to inform  
42 interventions, travel restrictions, and health care capacity generally assume equivalent pathogenicity and  
43 transmission potential [7]. Understanding if genetic clades differ in their infectivity and, if so, where they are most  
44 prevalent would aid efforts to design effective intervention strategies that control the virus and end the pandemic.

45 One of the greatest uncertainties for projecting future COVID-19 risk is how its evolution will affect its future  
46 transmission dynamics. Although most mutations are expected to be neutral and thus would not alter viral  
47 transmission or infection dynamics, the chance exists that one or more mutations affect viral traits that can either  
48 increase or decrease the manifestation of the disease in humans. For instance, the flu strain that caused the deadly  
49 1918 pandemic eventually evolved into a less virulent form that still circulates today [8]. In contrast, the bubonic  
50 plague evolved into a form with airborne transmission that enhanced outbreaks [9]. The evolution of virulence often  
51 trades off against transmission rate, thus offering two pathways for adaptive evolution, with the exact course taken  
52 dependent on multiple, interacting factors [10,11].

53 SARS-Cov-2 might be particularly likely to evolve given its high prevalence and global distribution [12]. Early  
54 reports indicate possible differences in growth rate and viral loads associated with certain mutations [13]. Although  
55 broad genomic divergence might be associated with functional changes in the virus, we pay particular attention to  
56 the evolution of the outer spike proteins of SARS-Cov-2. The evolution of the outer spike glycoproteins of SARS-  
57 Cov-2 may influence infection rates because these structural proteins bind the virus to host cells via the angiotensin-  
58 converting enzyme 2 (ACE2), which ultimately allows the virus to bind to and enter the host's respiratory cells and  
59 thereby cause COVID-19 [14]. This prediction is well-supported by theory, electron microscopy, and experiments  
60 [7,15,16] as well as observed mutations in spike proteins causing enhanced virulence in other coronaviruses [17].

61 The evolution of SARS-Cov-2, likely in an intermediate host between bats and humans, led to its spread in humans  
62 [18]. Further evolution of these spike proteins could enhance binding to human ACE2, enhancing transmission,  
63 infection rate, virulence, while exacerbating symptoms. Specific interest has focused on codon 614 of an especially  
64 glycosylated region of the viral spike protein, where positive natural selection has been confirmed for the D614G  
65 variant [7,12,19].

66 Here, we estimate whether clade and the D614G variant, when combined with weather and demographics, affected  
67 COVID-19 growth rates early in the pandemic spread. We examine early growth before widespread intervention  
68 was prevalent (up to April 13, 2020) because intervention altered the ability to separate biological mechanisms such  
69 as evolution from regulated human behaviors. We build on a previous model that successfully described global  
70 infection dynamics early in the pandemic and highlighted effects from ultraviolet light (hereafter UV light),  
71 temperature, humidity, and age structure on COVID-19 growth rates [20]. In this study, we modeled the growth rate  
72 of COVID-19 as a function of these same variables and one of two possible ways to describe virus evolution:  
73 variants of codon 614 or genetically distinct major clades. The 614G variant has increased in frequency around the  
74 world [13], and studies suggest that it might be more infectious than its predecessor, 614D, in experiments  
75 performed within cell lines [13,21]. However, it is unclear if infected individuals carrying this mutation are more  
76 contagious and there is no published support that 614G is more virulent [22] Hence we tested whether a higher  
77 prevalence of 614G variants within a population was associated with a higher growth rate of the disease.

78 Additionally, since the clade distinctions summarize major genetically distinct groups (encompassing numerous  
79 variants) that achieve significant frequency and spread (~20%), we also tested whether any of these clades were  
80 associated with increased growth rates. It should be noted that D614G does not define the clade divisions though it  
81 is considered the predominant missense mutation distinguishing isolates originating in Asia from those in Europe  
82 [13]. Several other variants are used to distinguish the clades in the 29.9 Kb genome. Clades 19A and 19B are  
83 associated with C8782T and T28144C, respectively. 20A has variants C3037T, C14408T, A23403G. 20B is  
84 associated with G28881A, G28882A and G28883C, and 20C contains C1059T and G25563T [23]. We compared six  
85 different models using boosted regression trees [24,25]: (1) a null model (intercept only), (2) weather and  
86 demography, (3) clades, (4) variants, (5) weather, demography and clades, and (6) weather, demography and  
87 variants. The weather and demography model was demonstrated to successfully predict COVID-19 growth rates in  
88 [20] using a different approach (linear regression). Boosted regression trees have several advantages over traditional  
89 regression approaches, including that this approach includes interactions when appropriate without the need to

5

90 specify them, removing variables that are irrelevant, and being able to adjust to any response shape [24–26].

91 We modeled the maximum growth rate of COVID-19 cases to restrict analyses to the early growth phase before  
92 social interventions reduced transmission, but after community transmission began, and when most people were still  
93 susceptible to this novel virus. We used growth rates in contrast to total cases because they are less sensitive to bias  
94 as shown in [20]. The analysis was restricted to political units with >40 cases to eliminate periods before local  
95 community transmission. These decisions resulted in data from 79 countries and 33 states or provinces where  
96 genetic data were also available. We restricted the sample to the three worst one-week intervals in each polity  
97 separately to characterize maximum potential growth rates.

## 98 Results

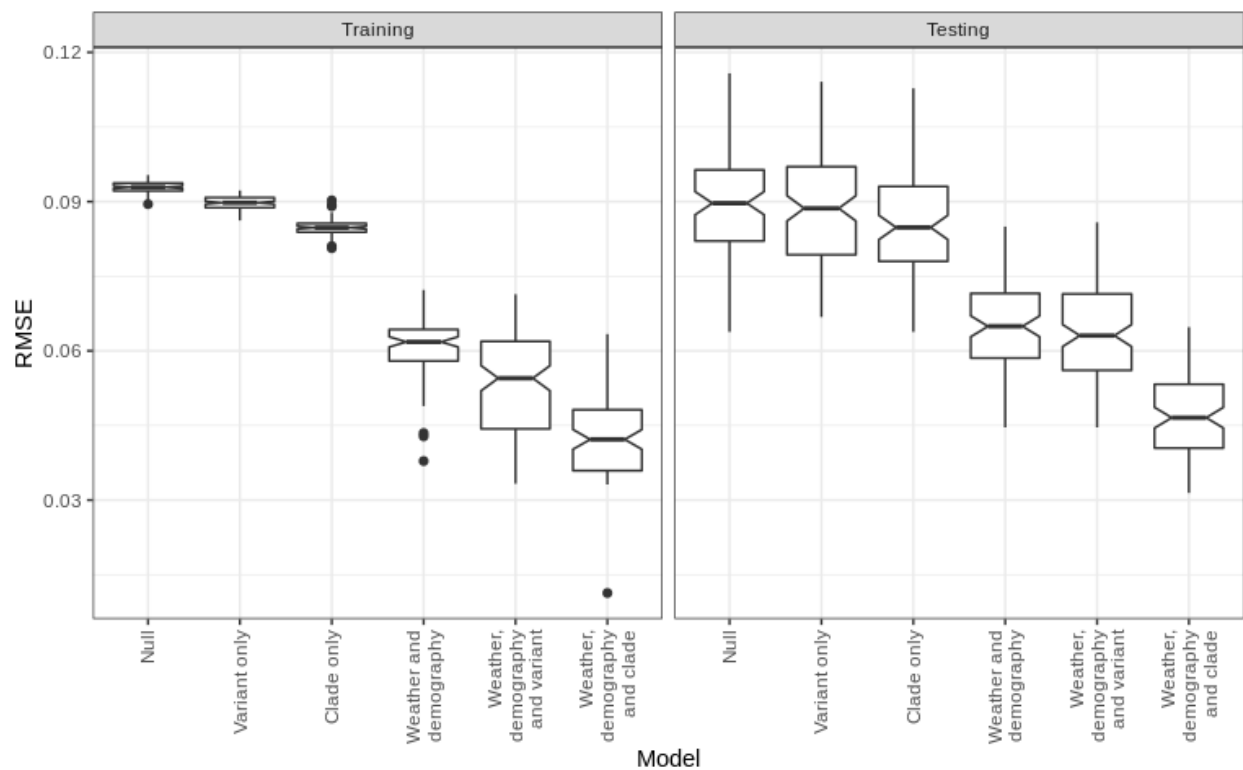

99

100 *Figure 1. Boxplot of the root mean square error (RMSE) of the models fitted for the train and test sets, where the*  
101 *notches in the boxplot represent the 95% confidence interval of the median and dots indicate outliers. Smaller*  
102 *RMSE indicate better models. In both the training and test sets, the best performing model is the weather,*  
103 *demography and clade model. The variant, demography and weather model on the other hand does not improve on*  
104 *the weather-only model in the test set, which suggests that the variant is less informative than clade.*

105 The best performing model included weather, demography and clade based on both training and independent testing  
106 data, such that the root mean square error (RMSE) was 25% lower and explained 15% more variance than the next  
107 best model. The model including weather, demography and variant did not substantially improve descriptions of  
108 disease growth relative to using only weather and demography (Figure 1). For more detailed results check on  
109 Figures s3 and s4 in supplementary materials.

110 We next assessed the importance of each factor in the model, which describes the reduction of squared error  
111 attributable to each variable. For all models that include the weather data, UV light was the most important variable,  
112 where COVID-19 growth rate diminishes as UV light increases. However, the summed importance of all clades was  
113 higher than for UV light, suggesting that the collective importance of clade prevalence is comparable to that of the  
114 dominant weather factor (UV) (Figure 2).

115 Clade prevalence had higher importance when included in models that also included weather which indicates  
116 interactions among these variables. We calculated Friedman's H-statistic [24,25] to assess the strength of  
117 interactions [25] between clades and other weather and demographic variables, which ranges between 0 and 1, with  
118 larger values indicating stronger interactions (supplementary table 1). Among the clades associated with higher  
119 growth rates, 20C has the highest interaction with relative humidity ( $H=0.27$ , Figure s3), almost double the  
120 interaction strength of the next highest interaction. Low relative humidity, combined with a high proportion of 20C,  
121 was associated with higher COVID-19 growth rates. In experimental and correlative studies, low humidity  
122 contributes to the spread of several respiratory viruses [20,27,28]. This interaction suggests that low humidity might  
123 enhance the spread of the more infectious clades of SARS-Cov-2.

124 Response curves indicate how COVID-19 growth rates depend marginally on clade prevalence (Figure 3). Higher  
125 prevalence of clades 20A and 20C were associated with higher growth rate, whereas higher prevalence of clades  
126 19A and 19B were associated with decreased growth rates. COVID-19 growth rate did not consistently vary with the  
127 prevalence of clade 20B. These patterns were consistent with those found when applying classic linear regression  
128 analyses (Figure 3), ensuring that trends we detected were not an artefact of the machine learning algorithm.

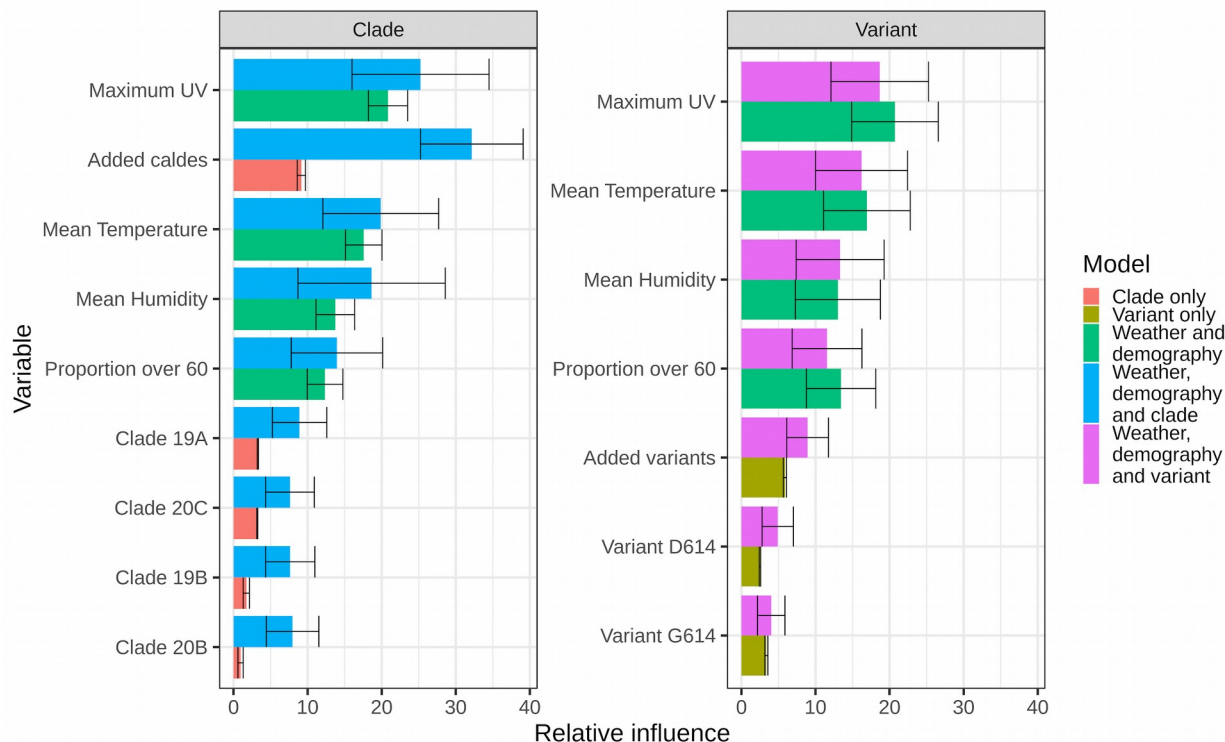

129

130 *Figure 2. Relative influence of variables for all models. Error bars indicate 95% confidence interval. UV light is*  
 131 *the most important variable in all models that contain that variable, however the summed importance of all clades*  
 132 *in the weather, demography and mutation model is more important than UV light.*

133 In order to validate the models built on data collected before mid-April, we tested predictions against  
 134 independent data for late April and May 2020. We calculated clade prevalence, average weekly growth  
 135 rates, and 14-day lagged weather conditions, assuming the proportion of people over 60 remained  
 136 constant over this short period following methods in [20] and compared the two best performing models  
 137 (weather, demography and clade vs. weather and demography) based on RMSE. Although widespread  
 138 health interventions were already becoming common during this time, thereby reducing growth rates  
 139 compared to the time period when our model was fit, the weather, demography and clade model still  
 140 made better predictions than the weather-only model in both April and May (RMSE = 0.106 versus 0.112  
 141 in April and RMSE= 0.136 versus 0.148 in May). RMSE during April and May was larger than RMSE  
 142 during cross-validation (based on February - early April data), consistent with findings in [20], likely due  
 143 to increased intervention during this time period, leading to consistently overestimated growth rates.

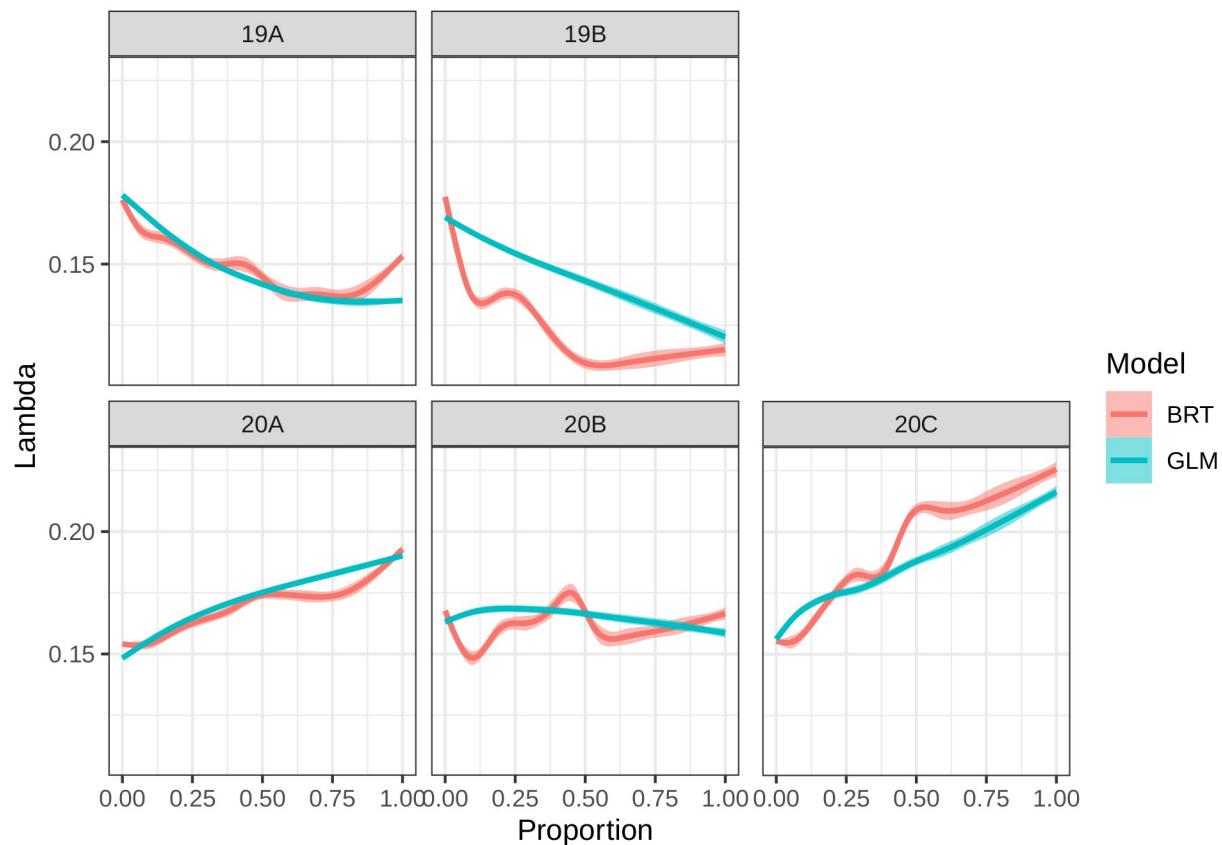

134

135 *Figure 3. The Boosted Regression Trees (BRT) model shows that COVID-19 growth rate increases with the*  
136 *proportion of clades 20A and 20C, does not have a strong association with the proportion of clade 20B, and*  
137 *decreases with the proportion of clades 19A and 19B. The same patterns hold when applying an alternative*  
138 *generalized linear model (GLM). These response curves are the result of the smoothed prediction of both types of*  
139 *models (using GAM) over 8,000 simulated points that maintain accurate summed proportions (see methods).*

140



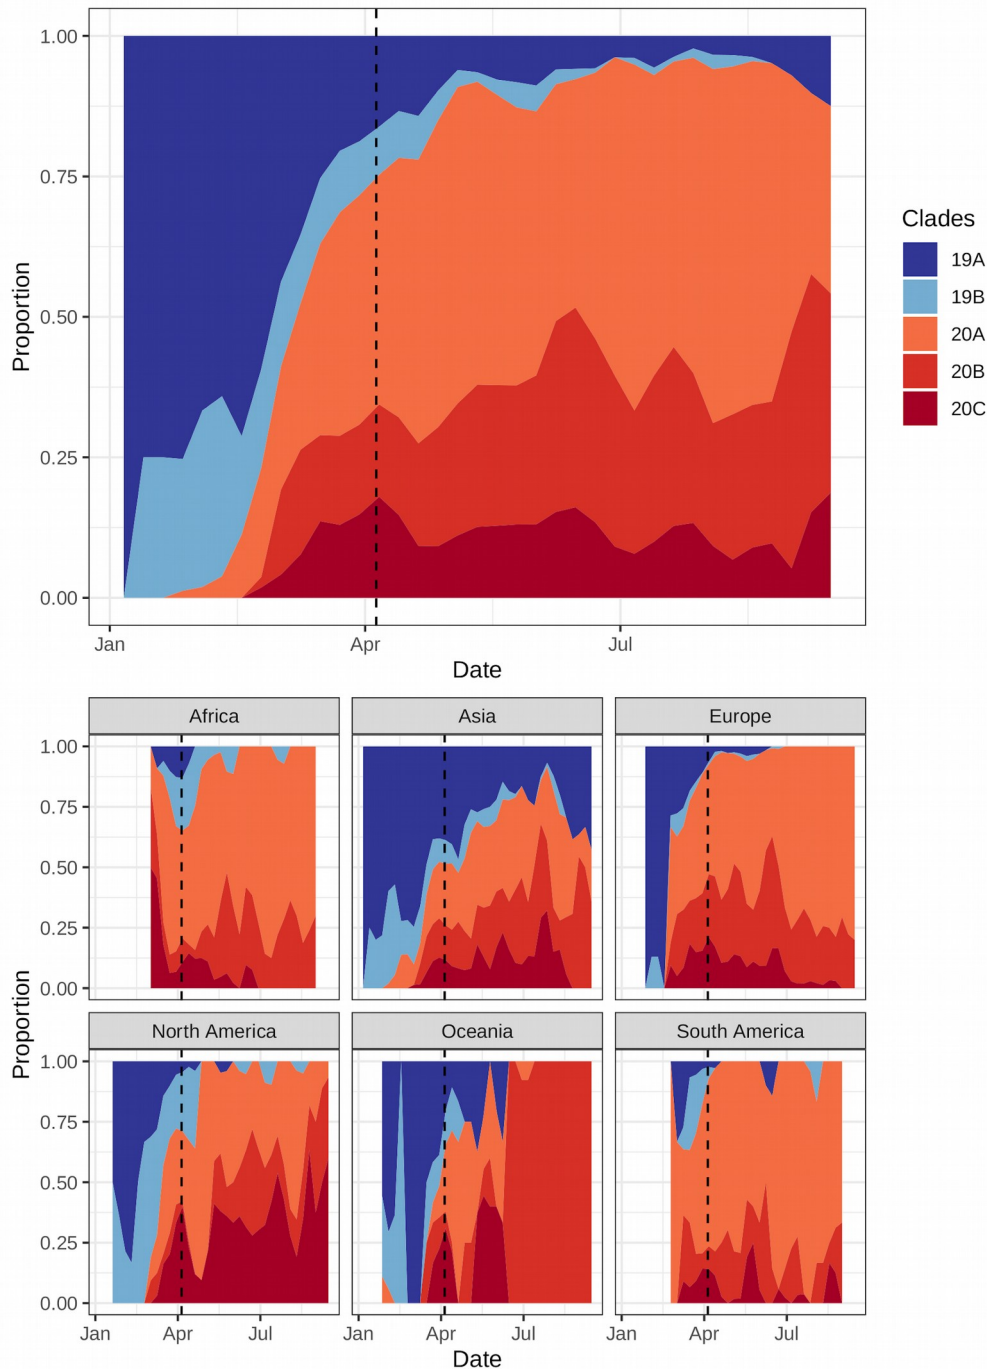

141

142 *Figure 4. Proportions of each clade globally (top) and by region (bottom). Clade 19 (blues) diminished over time,*  
143 *while clade 20 (reds) increased during that same period. Among the type 20 clades, 20A and 20B have increased to*  
144 *similar proportions globally while 20C had more moderate proportional growth. However, clade 20C has increased*  
145 *most dramatically in South and North America, two regions where COVID-19 has subsequently grown quickly. The*  
146 *dashed line represents the last date used for fitting the models.*

10

147 From January to September, clades 19A and 19B decreased from 96.7% of the 156 total cases tallied in January to  
148 5.2% of the 232 cases tallied in August, and 11.7% of the 51 cases analyzed so far in September (Figure 4). The  
149 three clades in group 20 all increased in proportion relative to clade 19. The most rapid increase in prevalence was  
150 for clades 20A and 20B. Clade 20C increased rapidly initially in prevalence but has since leveled out at the global  
151 scale but may still be increasing in North America. Given our results, we expected clades 20A and 20C to increase,  
152 if they are representative of total virus distributions worldwide. In August, over 60% of the cases registered in the  
153 world were classified as clade 20A. However, the change in proportion of these clades has not followed this pattern  
154 in various regions of the world. Using a binomial generalized linear model of changes in clade proportions through  
155 time, we found significant interactions of clade, date, and region (Null deviance: 12,415.4 on 974 degrees of  
156 freedom; Residual deviance: 2,152.3 on 915 degrees of freedom, significantly different from null model with Chi  
157 square p-value less than 0.0001). For both North America and South America, clade 20C grew to the highest  
158 proportion, with 55% in North America and 33% in South America. In line with growth rate model results, these  
159 two continents have had the highest total number of cases. At the same time, the peak monthly prevalence for the  
160 20C clade in Europe was in March, which coincides with the highest growth rates in Spain and Italy, two of the  
161 countries with the largest number of cases in Europe.

162 During the month of August, which is our last full month for which data was available, either clade 20A or 20C was  
163 the most abundant clade in several regions: In South America, 81% of the cases in August were from those two  
164 clades, followed by 78% of the cases in Europe and Africa, and 75% of the cases in North America. In contrast, all  
165 of the cases in Oceania were classified as 20B, a clade associated with lower growth rates according to our results.

## 166 **Discussion**

167 We provide new evidence for an evolutionary effect on the COVID-19 growth rate early in the pandemic. Although  
168 two different measures of SARS-Cov-2 evolutionary divergence were tested, only the prevalence of different genetic  
169 clades improved the explanatory power of COVID-19 growth rate before widespread interventions were  
170 implemented and predictions after intervention. Although UV light was still the single most important predictive  
171 factor, cumulative importance across all five major clades was comparable to the importance of UV light, indicating  
172 that mutations resulting in the formation of major clades might have been a critical factor shaping early spread. Both  
173 clades 20A and 20C were associated with higher growth rates while clades 19A and 19B were associated with lower

11

174 growth rates. Notably, a considerable amount of variation in growth rate remained unexplained, which we attribute  
175 to variation in social behavior and health care availability as well as more comprehensive intervention, testing, and  
176 care policies that were implemented at varying times depending on polity. The three continental areas with the  
177 highest proportions of either clade 20A and 20C during the month of August 2020 were South America, Africa and  
178 North America, suggesting the potential for higher growth in these regions in future time periods.

179 It is notable that mutation D614G did not improve model performance per se, whereas finer distinctions among  
180 clades - the variants discussed about - that included this mutation did improve model performance. Variant 614G  
181 maps to all genomes in clade 20 (Supplementary Table 2), and even when there is not a one to one concordance  
182 between variants and clades, 99.65% of the cases that belong to the 614G variant, are part of the 20X clade with  
183 only 0.35% remaining being part of the 19X clades, of these, 45.43% of the cases belong to the 20A clade, 36.76%  
184 to 20B and 17.45% to 20C.

185 However, among these clades, only 20A and 20C were associated with increased growth rate while clade 20B was  
186 not (Figure 3). Consequently, clade 20B's patterns confound any directional trend when combined with patterns for  
187 clades 20A and 20C, making variant D614G appear to have low explanatory power. Hence, we found that variant  
188 D614G is important, however only particular clades that include this mutation appear to be associated with increased  
189 COVID-19 growth. While clinical studies have associated the spike protein D614G variant with increased viral load,  
190 the full impact of D614G is not conclusive in terms of increased transmission or severity [22,29]. It is difficult to  
191 determine whether specific variants are neutral and increasing from demographic processes, or in fact, increasing the  
192 rate of transmission and/or severity. Van Dorp and colleagues [30] examined approximately 200 homoplasic  
193 variants across over 45,000 genomes and did not find any relationship between transmissibility and 614G. However,  
194 a study focused on county level models in the United States examined the impact of D614G in conjunction with  
195 population density and found that the presence of 614G significantly increased transmission [31]. The data suggests  
196 that the path to developing mitigation policies and therapeutic tools will need to encompass a broader view of the  
197 role of these clades. The prevalence of clades 20A and 20C is acknowledged in recent studies and, with it, an  
198 associated focus on finding rare or descendent variants outside of D614G that may contribute to this [32,33].

199 Another interesting aspect of our research is the finding that environment and viral characteristics can interact in  
200 complex ways that might enhance or diminish the infectivity of a viral clade. At high humidities (approximately  
201 80%), we might not see any difference in the growth rate of the disease. In contrast, at low humidities, the genetic

12

202 composition of SARS-Cov-2 could become more important. Few studies combine both an understanding of the  
203 evolution of disease agents in combination with weather or climate variables. However, many other such  
204 interactions are likely when we begin to explore these two factors in disease dynamics more fully.

205 Some limitations of our study are important to recognize when interpreting the results. First, genomic information  
206 remains limited, and although we analyzed 9000+ genomes, sample size issues remain important (6). In particular,  
207 the number of cases available for the estimation of the proportion of each clade or variant in a given polity at a  
208 particular point in time was sometimes low. The number of cases within a polity ranged from 1 to 110, with a  
209 median of 21. However, we performed a sensitivity analysis, removing polities with fewer than five cases, and  
210 demonstrated that removing polities with low numbers of samples resulted in qualitatively similar results, with the  
211 exception of a flatter response for clade 19B (Figure S5). To further test our analysis, we developed another,  
212 sensitivity analysis, we generated 95% multinomial confidence intervals for the clades proportions following (Sison  
213 and Glaz 1995) and made 100 replications of analysis selecting randomly for each polity the lower upper or  
214 estimate, and generated a new analysis with that. As was the case with the prior sensitivity analysis, the results were  
215 very similar with clade 19B again being the only one differing by having a flatter response (Figure S7). A related  
216 caveat is that the flexibility of BRTs allows for the possibility of overfitting to potentially idiosyncratic trends in  
217 clade prevalence. To address overfitting, we took two steps. First, we used replicated, balanced cross-validation to  
218 produce an ensemble of models, and weighted these models by their predictive performance on withheld data to  
219 make our final predictive model. Second, we also fit simpler generalized linear models that showed the same  
220 qualitative patterns (Figure. 3). Although we find a correlation between COVID-19 growth rate and the prevalence  
221 of certain clades, we cannot yet make conclusive statements about the causality. The chance remains, as with all  
222 correlative models, that these correlations are spurious and reflect spatial structure in neutral evolution that happen  
223 to be also associated with outbreaks. For instance, the high growth rates of COVID-19 in North and South America  
224 could have been aided in part by a more rapidly spreading viral variant, or alternatively the growth could have  
225 occurred for a number of reasons and this variant just happened to have been prevalent there. Only through  
226 controlled trials could we begin to separate out causality from correlation, and given the inability to do this, we can  
227 only rely on such observational evidence in combination with future laboratory studies to suggest patterns that merit  
228 further detailed study.

229 Despite these caveats, results suggest multiple key pathways for further monitoring and testing. First, we found that

13

230 evolution contributed to variation in initial growth rate among political units as much as UV light. Our results from  
231 real-world observations of transmission and disease growth suggest that the current genetic clades matter more than  
232 the widely studied D614G mutation. We did not find evidence that the mutation D614G alone contributed to early  
233 growth rate, in spite of findings elsewhere that this mutation increased more readily in clinical settings and appeared  
234 to be under positive selection [12,19,22]. Continued genomic monitoring is critical to detect whether certain clades  
235 associated with the current, or that arise de novo, change in frequency over time.

236 Although SARS-Cov-2 is unlikely to evolve as quickly as influenza, our results demonstrate an important potential  
237 for existing genetic changes to already have influenced disease growth rate. Additional research is needed to test if  
238 different clades vary in the types or severity of COVID-19 symptoms - the increase in growth rate is not sufficient to  
239 imply that clades 20A and 20C are more virulent. The opposite could be true if the virus evolves enhanced  
240 transmission at the cost of its virulence. On the other hand, if reporting is biased toward the most symptomatic cases,  
241 then these clades might be expressed more severely rather than spread more rapidly. Correlating infected clade with  
242 symptom severity in an unbiased sample is a critical research need.

243 Importantly, a large amount of unexplained variation suggests that social behavior and public health interventions  
244 likely contribute much more to variation in COVID-19 spread than evolution or weather [34]. Moreover, the large  
245 pool of uninfected hosts will continue to dominate the epidemiology of this disease. However, evolutionary changes  
246 and weather could provide a greater or lesser potential for rapid spread especially once social interventions are  
247 relaxed or once a smaller pool of people are susceptible either through exposure or vaccination. The dominance of  
248 the genetic clades associated with high growth rate in regions that experienced rapid growth of COVID-19 in later  
249 months is suggestive, but not yet conclusive, that these clades have the potential to influence COVID-19 dynamics.

250 Modern epidemiology can anticipate many features of disease outbreaks and mitigate their effects on human health  
251 through myriad public social, health, and pharmaceutical interventions. Yet, we often still cannot predict with  
252 certainty how a particular agent will evolve and whether these adaptations will enhance or reduce virulence or  
253 transmission. As we understand more about the evolution of disease agents, such as SARS-Cov-2, this information  
254 should aid our ability to make accurate predictions about future outbreaks and design effective public health  
255 interventions in order to end this pandemic and prevent new ones from emerging.

## 256 **Methods**

### 257 **COVID-19 dataset**

258 Maximum growth rates of COVID-19 cases were modeled to limit research to the early growth period before  
259 transmission was decreased by social measures, but after transmission to the population started and when most  
260 people were still susceptible to this new virus. The average maximum growth rate ( $\lambda$ ) was calculated as the  
261 exponential increase in cases:  $\ln(N_t) - \ln(N_0)/t$ , where  $N_t$  = cases at time,  $t$ , and  $N_0$  = initial cases. We used a repeated  
262 measures design for the three worst one-week intervals in each political unit (country or state/province depending on  
263 available data [3]), where  $t = 7$  days (see sensitivity analysis in [20] which demonstrated that other time windows  
264 from 1-7 days lead to similar results due to the temporal autocorrelation of weather). There is considerable variation  
265 in testing and reporting of COVID-19 between countries and even smaller political units which makes models based  
266 on count data unreliable. Comparatively, using growth rates should remain resilient to biases introduced by  
267 differences in report rate, assuming that detection probabilities do not change substantially in a given polity during  
268 the short, one-week period. We limited analyses to polities with  $>40$  cases to ensure that the transmission of the  
269 disease was local. which led to a database comprising 128 countries and 98 states or provinces.

270 We obtained daily infection data from [3] and 3-hour weather data from the ERA5 reanalysis for the 14 days  
271 preceding case counts [35]. We averaged these values to reflect the possibility that infection could have occurred  
272 during the previous 14 days, consistent with the 1-14 day infective period widely reported [36]. Given the  
273 uncertainty in the joint distributions of symptom onset, testing, and reporting, as well as not knowing the degree to  
274 which variables influenced COVID-19 case growth via transmission versus the expression of symptoms (e.g.,  
275 vitamin D immune function), we chose to average across the potential period of infectivity, thereby assuming  
276 weather each day in the preceding 14 days was equally important. However, results were robust to a range of other  
277 assumptions when calculating lagged weather variables, including weighted means centered on 6, 9, and 12 days as  
278 well as different variances in [20]. We used fine-scaled weather data rather than long-term climatic monthly means  
279 to model observed weather-outbreak dynamics. Weather data was weighted by population size in each  $0.25^\circ$  grid  
280 cell within each political unit to capture the weather most closely associated with outbreaks in population centers.

## 281 **Genomic clade dataset**

282 We evaluate how well the proportion of each of the five major clades as defined by NextStrain, and the proportion  
283 of known mutations of codon 614, maximum COVID-19 growth rate across political units (6). These proportions  
284 were based on the observed proportions of clades and the variant scored in each political unit (sensitivity analysis  
285 based on upper/lower bounds of these multinomial proportions yielded similar results; Figure s7, where only 19B  
286 seems to have a flatter response than our results). We used 319 estimations of the proportions for 108 political units  
287 comprising 9,001 cases of COVID-19 for clade proportions, and 317 estimations of the mutation proportions for 107  
288 political units (only Ghana is missing) comprising 7,457 cases. The number of cases for the estimation of  
289 proportions of clades varied among territories, where we estimated the proportion using a minimum of 1 individual  
290 case for 20 territories and a maximum of 110 individuals for three territories, a sensitivity analysis was made using  
291 only the polities that had at least 5 cases to calculate the proportions. To see how small samples sizes affected  
292 results, we performed an analysis in which we eliminated data from polities with fewer than five genomes. Results  
293 were qualitatively similar to those using the full dataset, except that clade 19 had a flatter response (see Figure s5).  
294 In the case of the codon variants, we had data for 29 polities with a single case and three with a maximum of 94  
295 cases. For each polity, we selected the worst three one-week intervals of disease growth rate when available  
296 following [20], however, there were 5 polities where only 2 weeks were available for the time-frame selected for  
297 clades, among those was Ghana, which was not part of the dataset for mutations. Within the polities that had all 3  
298 weeks, there were differences of a minimum of 14 days between the first and last date, and a maximum of 56 days.  
299 The earliest date used was January 22 for one territory, and the latest estimation was from April 05 for 1 territory.  
300 The most common clade for each polity is shown in Figure 5, and the proportion of each clade for each territory is  
301 shown in Figure s6.

302 We used cross-validation to estimate relationships between explanatory factors and COVID-19 growth rate, which  
303 uses the performance of models trained on a subset of data and applied to left out data. Such methods are especially  
304 important to avoid overfitting more flexible models. We applied stratified 10-fold cross validation, repeated five  
305 times, and trained models on 90% of the data and tested them with the remaining 10% based on a constrained  
306 randomization procedure to generate the folds. We stratified by polity such that if one week was assigned to the  
307 training set, the rest of the weeks were also assigned to the training set to ensure that information about a polity in  
308 the test data was not also included in training data, thus potentially augmenting confidence in the model. Given this

16

309 procedure, not every split was exactly 90:10, so we also constrained the randomization to be < 5 cases from an exact  
310 90:10 split, which produced 95 different training sets and 95 different testing sets for the clades. We repeated the  
311 same process for the variant, and this procedure yielded 121 different training and testing sets.

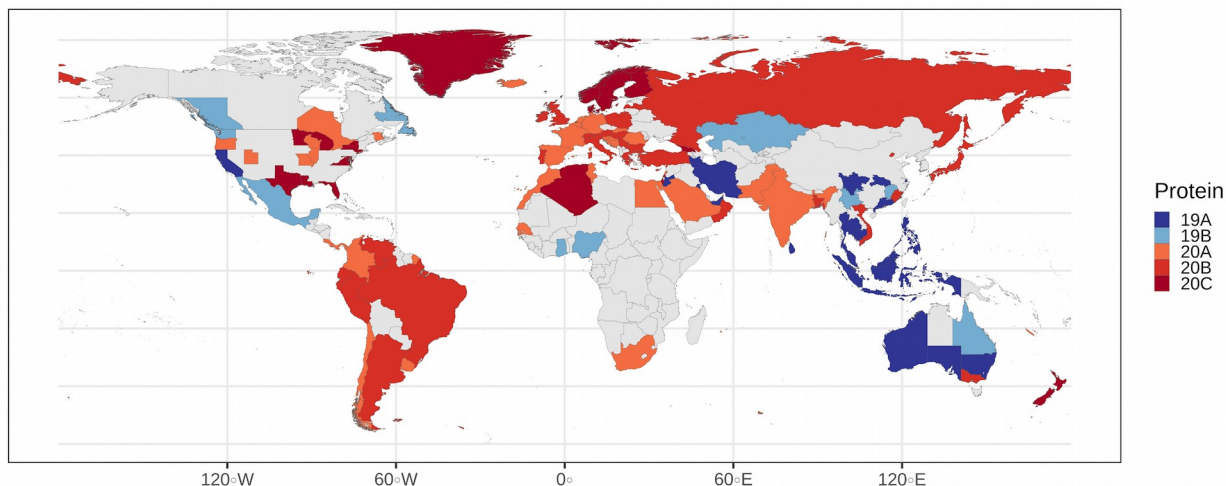

312

313 *Figure 5. Most common clade on each polity as seen in the map, clades 19A and 19B dominate in Oceania and*  
314 *southeast Asia, whereas clades 20A, 20B and 20C dominate in South America, Europe and North America.*

315

316 We used boosted regression trees (BRTs) to fit models because they offer several advantages over other regression  
317 techniques. BRTs are a type of machine learning technique that seeks to optimize the predictive accuracy of out-of-  
318 sample data in an iterative process and using an ensemble of regression trees. By focusing on prediction, BRTs can  
319 provide a better estimate of predictive accuracy in contrast to traditional generalized linear models (e.g., linear  
320 regression). They tend to avoid including irrelevant variables, and interactions between variables are inherently  
321 included without the need to specify them a priori [24,37]. Furthermore BRTs can fit any shape of response, and  
322 hence avoid the possibility of underfitting. However, due to this flexibility, cross validation is necessary in order to  
323 avoid overfitting. Since BRTs depend on tree-based methods, the number of bifurcations of each variable together  
324 with the reduction of the residual error in each of those can be used to calculate the relative influence of each  
325 variable [24,38].

326

327 For each training set we did a 10-fold-5-repeated cross-validation to reduce overfitting, selecting the best model  
328 optimizing the value of Root Mean Squared Error (RSME) following [39] using the caret package [40] and boosted  
regression trees through the *gbm* package [38]. This process was done 95 times for the clades and 121 times for the



17

327 mutant, i.e., once for each training set. For the hyper-parameter tuning, we used the following grid for the interaction  
328 depth 1, 5, 9; the number of trees for boosting were 1, 50, and a sequence 50 by 50 up to 1500 trees; shrinkage of 0.1  
329 and 0.01 and a minimum number of observations in the terminal nodes of either 10 or 20.

330 We next created a weighted ensemble model that best predicted the withheld data in each of the 95 different training  
331 and testing sets. This was done in order to further diminish over-fitting by then weighting the value of each fitted  
332 model by the inverse of our overfitting metric. The overfitting metric was based on the cubic root of the difference  
333 of the R-squared value in the test and training sets. We chose the cubic root to give high weight to models where the  
334 training and testing performance was the most similar, and thus to reduce overfitting even more than in most  
335 applications because our aim was to predict using the simplest models supported by the data. At the same time, we  
336 calculated the weighted testing model performance as the root mean squared error (RMSE) and variance explained  
337 ( $R^2$ ) for each model (except the null model), thus resulting on a 95 and 121 testing metrics, to understand how  
338 sensitive the ensemble model was to different test sets.

339 Given the flexibility of BRTs, we also applied traditional generalized linear regressions to the same data to see if  
340 results were robust to methods. To be consistent with the BRT models, we used an ensemble of the best performing  
341 GLMs. For the GLM, we fitted the weather and protein model with all the variables, including linear and quadratic  
342 terms for every variable. We next assessed model performance using the Akaike information criterion, and then  
343 assessed further models of a similar structure but without two of the highly correlated variables. From our model set,  
344 we averaged the coefficients for the ensemble of models that summed to 0.95 in Akaike weights. Thus, the GLM  
345 models also developed a set of predictions based on a model-averaged ensemble of predictions, and thus accommodate  
346 more flexible curvilinear relationships with explanatory factors as compared to the single best polynomial model.  
347 Results from GLM and BRT approaches were highly similar (Figure 3), suggesting concordance, a lack of  
348 overfitting for the BRTs, and qualitatively similar results, regardless of which approach is applied. We focus on the  
349 BRT results in the main text given the further checks that we applied to prevent aggressive overfitting.

## 350 **Models**

351 We generated six different models to test how much of the variance was explained by weather, demography, genetic  
352 classification, and/or the presence of the mutation D614G. We first fitted a model that only used weather and  
353 demographic variables. Six different models were tested, beginning first with the weather and demography model  
354 evaluated previously, where the growth rate for the prior seven days was explained only by weather factors and the

355 proportion of the population with age over 60 years old as it was demonstrated in previous work [20]. In this model,  
356 the COVID-19 growth rate ( $\lambda$ ) for the prior seven days was modeled as a linear function of weather variables  
357 calculated over the 14 day interval preceding the estimate of lambda and the proportion of the population over age  
358 60. Weather variables included the mean daily temperature  $\lambda$ , the maximum of the mean daily UV , and the mean  
359 daily relative humidity. Sensitivity analysis in [20] explored different combinations of these and other variables as  
360 well as lagged intervals ranging from three to 21 days and found that predictions were robust to these various  
361 possibilities. Hence we use the model selected in that study as the starting point for examining whether additional  
362 information on SARS-Cov-2 evolution can improve explanatory power. The second model tested if the same  
363 COVID-19 growth rate was explained by the proportion of clades in a polity, without taking into account either  
364 weather or demography. Concurrently, a similar model was fitted with the same rationale, but using the D614G  
365 variant instead of clade classifications, where we tried to explain the growth rate by the proportion of n - 1 of the  
366 alternative clade or mutation, leaving one out to ensure model identifiability following the conventions used to  
367 analyze multinomial compositional data [41]. The main purpose of this was to test the degree to which these models  
368 explained the variation of the growth rate of the disease. Then we built models using the weather and demographic  
369 variables with either the protein or mutation information to test if a full model with either classification improved on  
370 the weather/demography models. All of these models were then compared to null models (without explanatory  
371 factors and just an intercept) to test if any of them were better than just using the mean as an estimated growth rate.

## 372 **Response curves**

373 To build the response curves of COVID-19 growth relative to the proportions of each clade (Figure 3, describing the  
374 marginal response of growth rate to the prevalence of each clade), we used an approach that ensured that proportions  
375 summed to one and maintained correlations between clades to incorporate observed interactions. In order to do that,  
376 we used a methodology to generate discrete random variables constrained to marginal probabilities and correlations  
377 following Barbiero (28). We used each of the counts of clades in each of the polities to calculate both the correlation  
378 and marginal distribution of the frequency of each of the clades, and simulated data sets until the concordance of the  
379 correlation between simulated data and real data was less than 0.1 for all clades in 8,000 simulations. For each site,  
380 we simulated the frequency of each protein and then calculated the correlation of the proportions in order to  
381 compare it to the proportion in the dataset (shown in supplementary Figure 1). We then used these simulations  
382 together with the weather and demographic variables fixed to their respective means in order to predict lambda for

19

383 each simulated data set. This procedure was designed to capture the variability among the simulated datasets.

384 Finally, we smoothed these predicted values of lambda using a generalized additive model (with smoothing

385 determined by maximizing cross-validation). This procedure was used for both the BRT and GLM predictions

386 (Figure 3).

387 To test for the strength of interactions between variables, we used Friedman's H statistic [25], which tests the

388 strength of the interaction between variables on a scale from 0 to 1, where 0 means no interaction, and 1 means total

389 dependence. This statistic was calculated for all pairs of interaction in each model.

## 390 Supplementary material

391

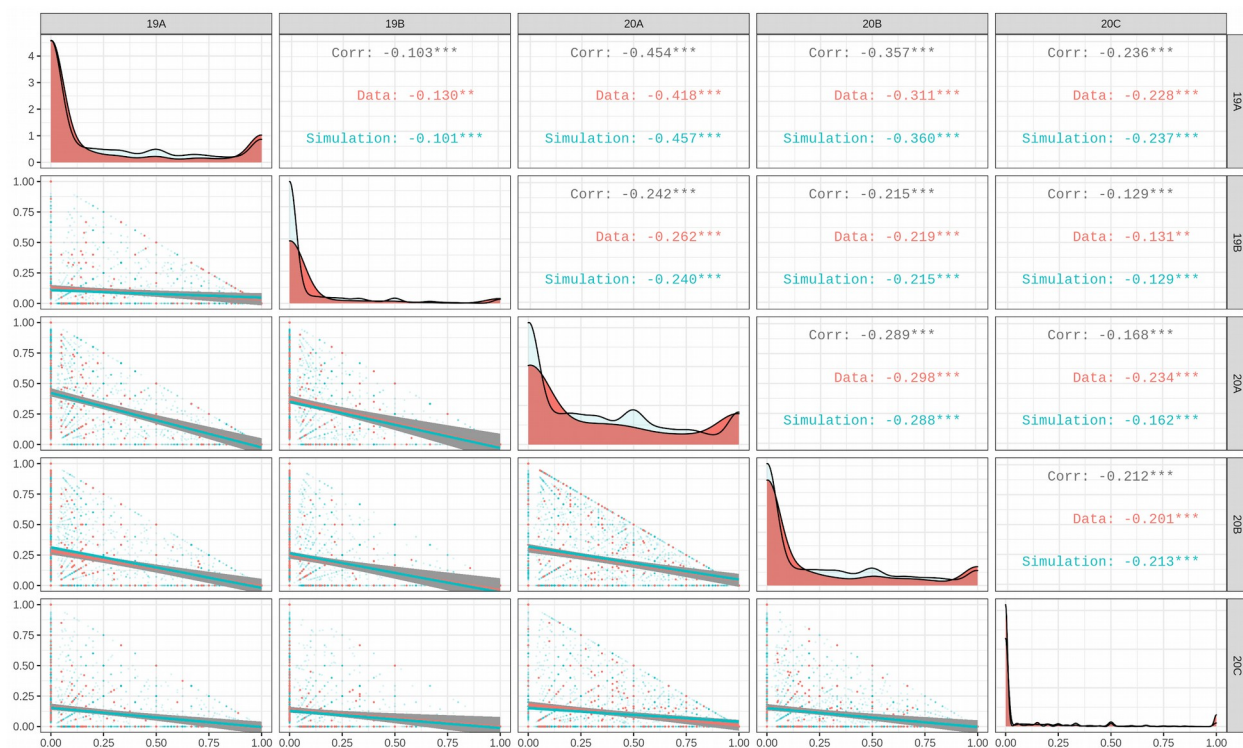

392 Figure S1 simulated (blue) against modeled data (red), showing the correlation, frequency and scatterplot of both

393 plus the lines of the correlation estimation. As seen in the graph, the simulation is very similar to the data.

20

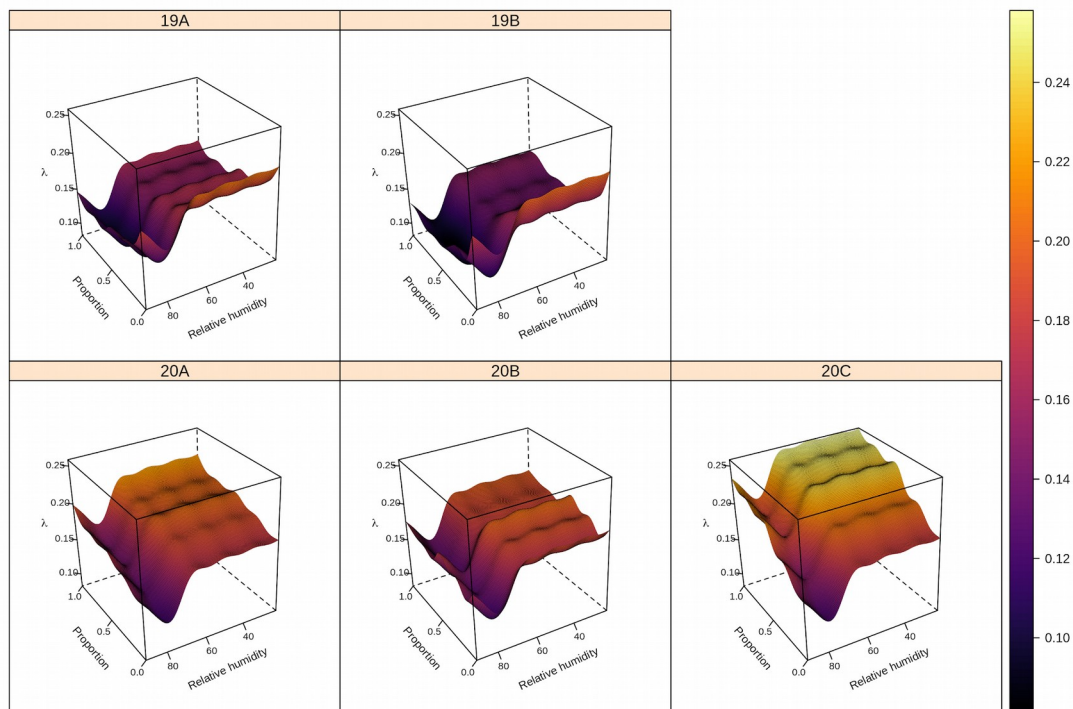

394

395 *Figure S2: Predicted COVID-19 growth rate (color gradient from dark blue to yellow) based on the interaction*  
396 *between relative humidity and the proportion of clade 20C. Higher proportions of clade 20C and lower relative*  
397 *humidity are associated with higher values of COVID-19 growth rate. The clumps are a byproduct of GAM-*  
398 *smoothing across the discrete nature of classifications by nodes in Boosted Regression Trees.*

399

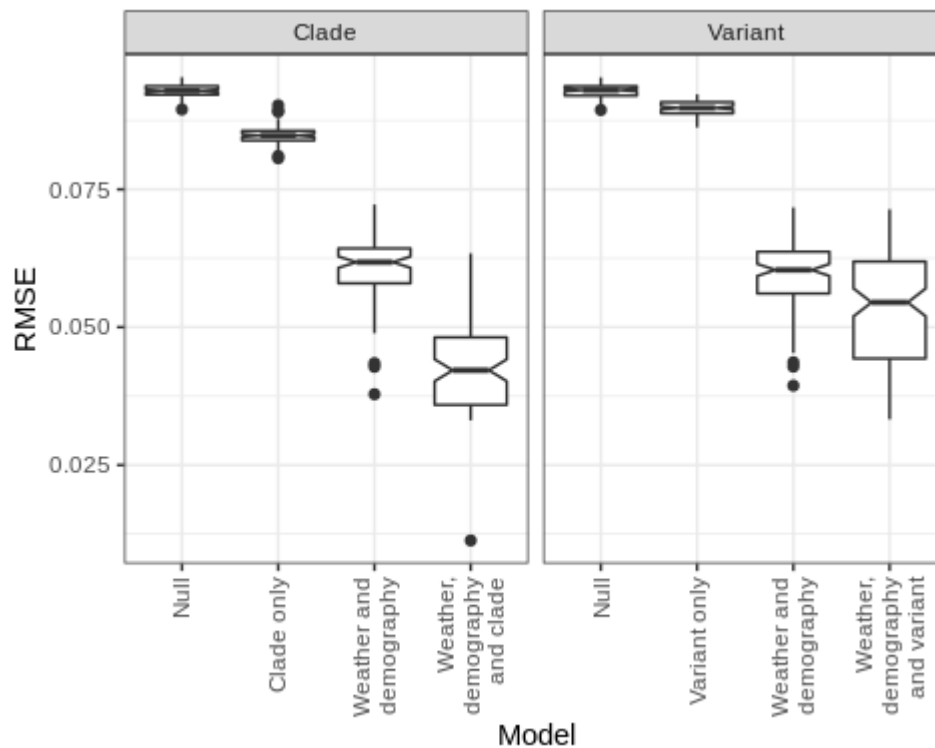

400

401 *Figure S3 The root mean square error (RMSE) for all training sets, where lower RMSE indicates better performing*  
402 *models. Differences between null models and weather and demography models between the protein and mutation*  
403 *analyses arise because of different datasets for each of them. The best model among the training sets is the weather,*  
404 *demography and protein model.*

405

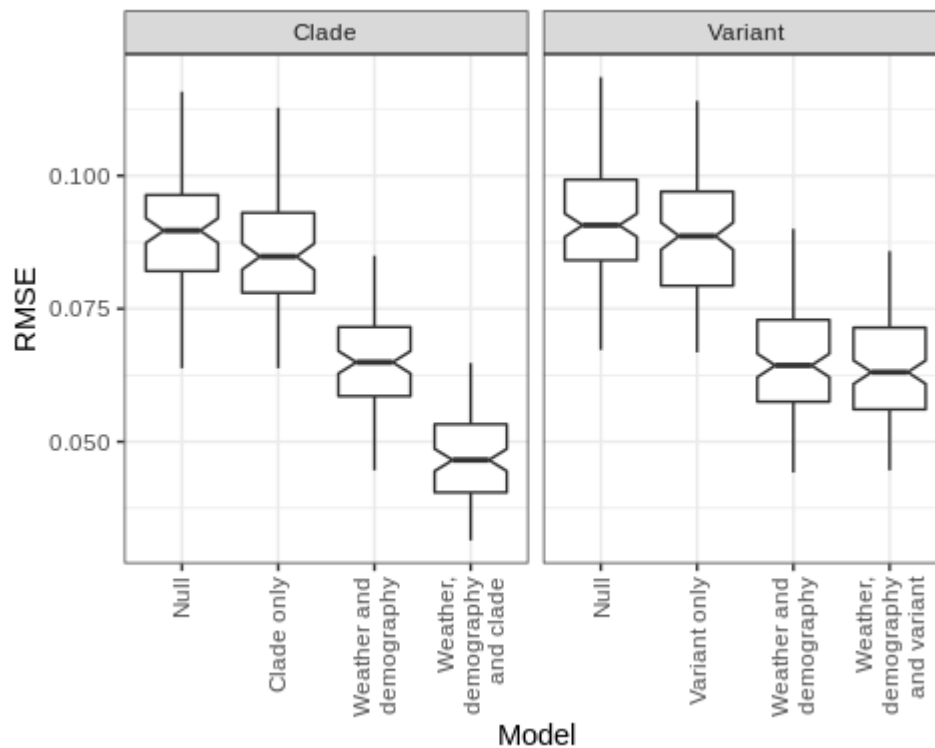

406

407 *Figure S4 The RMSE for all testing sets. The null and weather and demography models differ because they are*  
408 *applied to different datasets consistent with either the mutation or protein data. The best model within the testing*  
409 *sets is the weather, demography and clade model.*

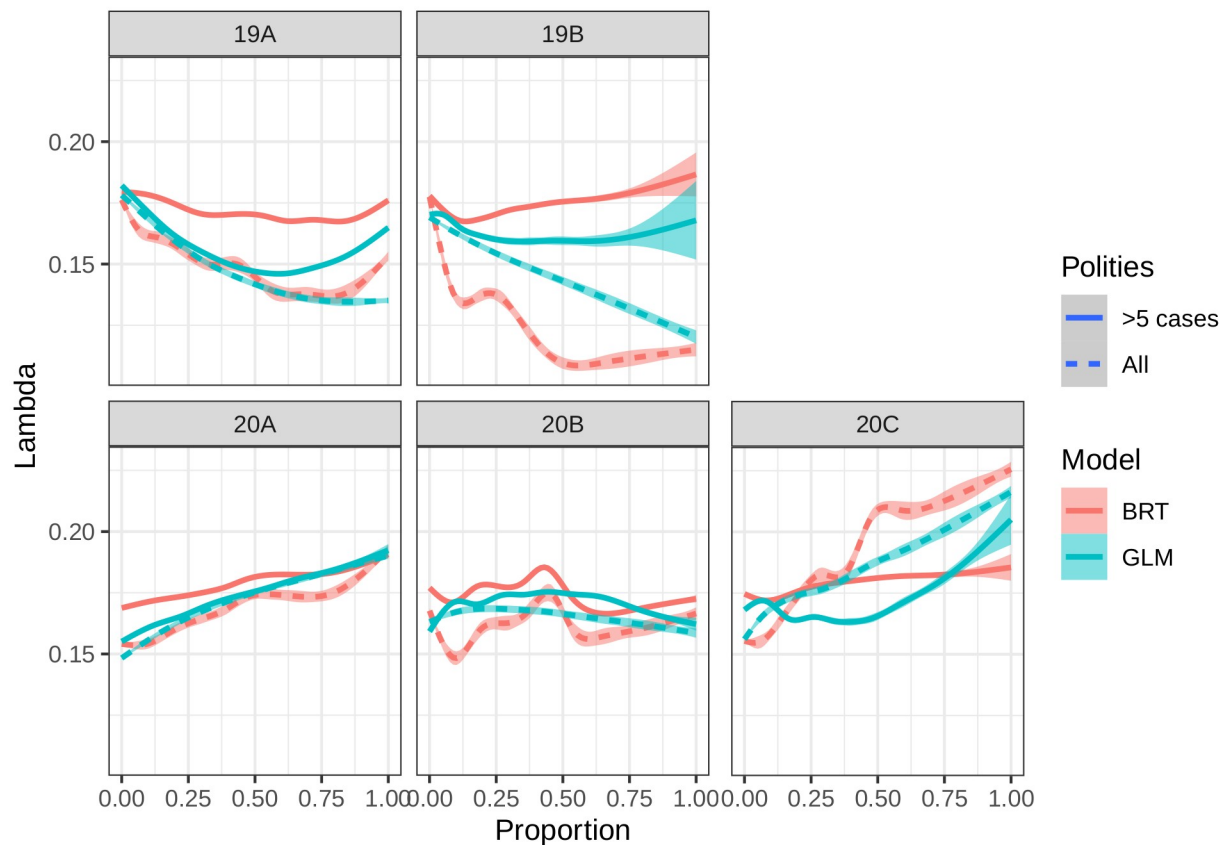

410

411 *Figure S5 Sensitivity analysis to check if using only polities with five or more cases changes the results. This*  
412 *restriction reduced the number of polities from 319 to 248, losing nearly a fourth of the data. Despite the*  
413 *reductions in samples, the responses remained qualitatively similar, except that Clade 19 changes from a negative*  
414 *to a flat relationship. Both clades 20A and 20C maintain their positive relationship between prevalence and*  
415 *COVID-19 growth rate.*

416

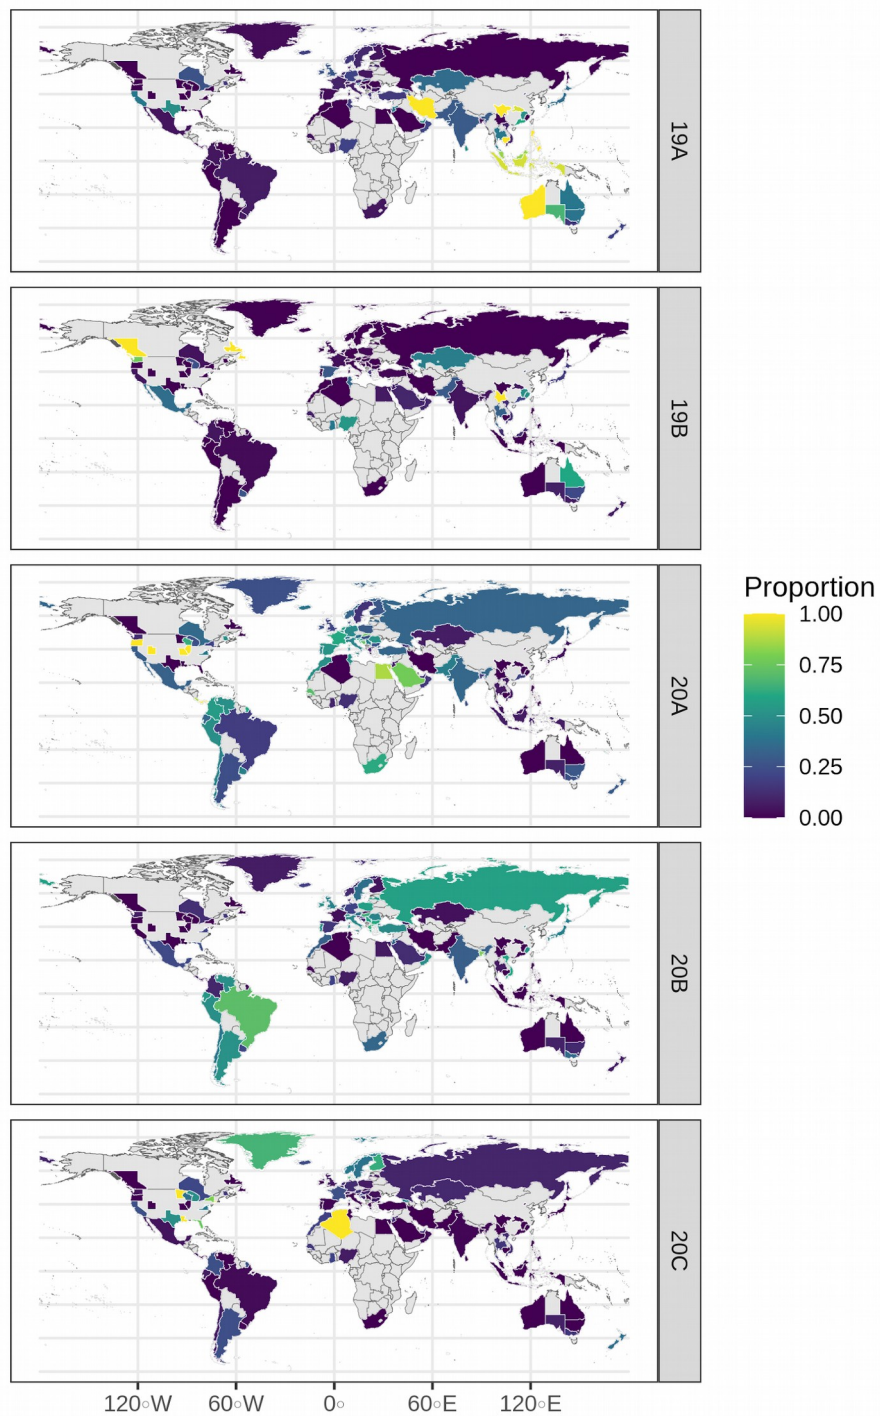

417

418 *Figure S6 Proportions of each clade for every measured polity, as shown in the map clades 20B and 20A are more*  
419 *common in the americas, and europe, while 19A is most common.*

420

421



25

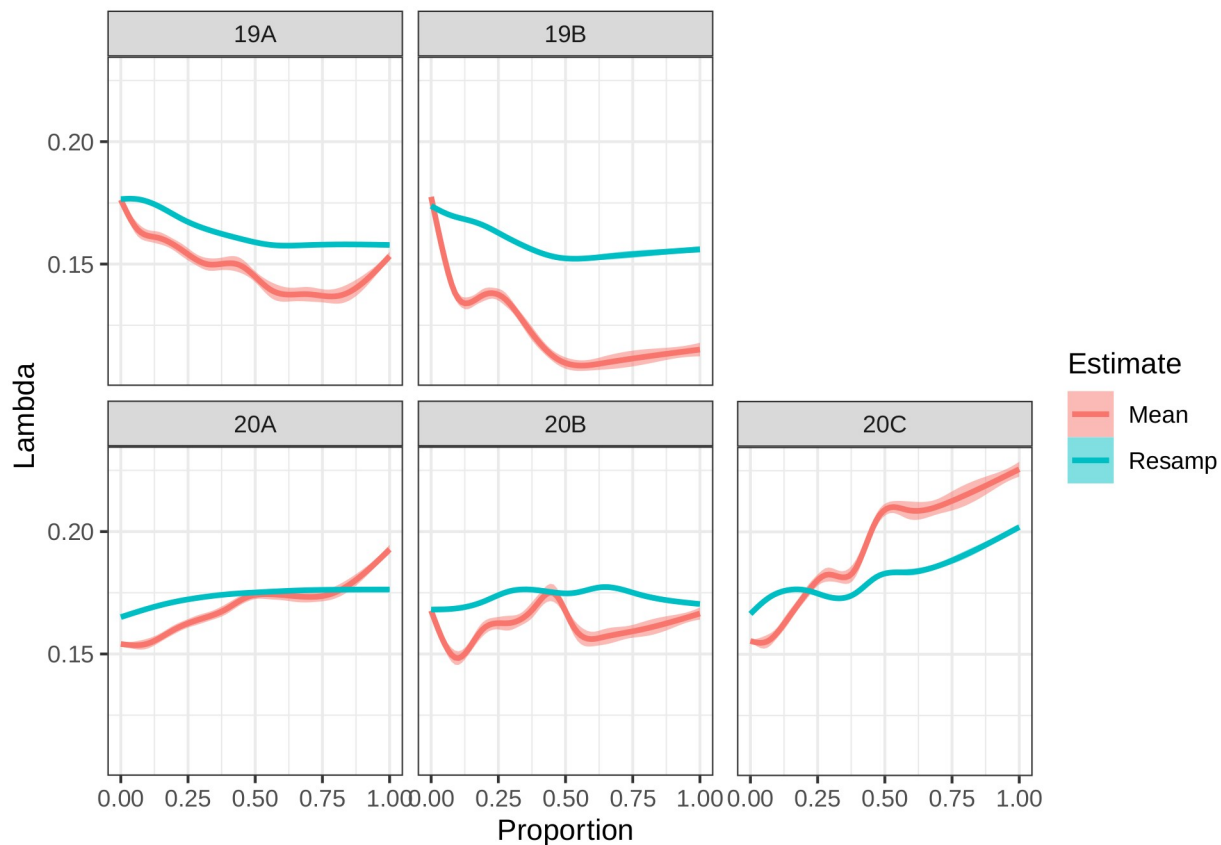

422

423 *Figure S7 Sensitivity analysis showing the response of remodeling with each polity resampled 100 times choosing*  
424 *randomly between the Estimate, the upper and lower bound of a 95% multinomial confidence interval, the mean*  
425 *(red line), corresponds to the estimation using our models, while the resampled results are in blue. The only clade*  
426 *that seems to change is 19B which tends to have a flat response instead of having a negative relationship with*  
427 *Lambda.*

428

429

430

431

432

433

26

|                    | 19A  | 19B  | 20B  | 20C  |
|--------------------|------|------|------|------|
| Temperature        | 0.10 | 0.10 | 0.12 | 0.10 |
| UV light           | 0.11 | 0.10 | 0.08 | 0.08 |
| Humidity           | 0.25 | 0.16 | 0.29 | 0.27 |
| Proportion over 60 | 0.33 | 0.22 | 0.11 | 0.17 |

434 *Table S1. Friedmans H-statistic between clades and weather variables. The relative humidity is almost twice as*  
 435 *important as any other variable in terms of its interaction with clade 20C*

436

| <b>Variant\Clade</b> | <b>19A</b> | <b>19B</b> | <b>20A</b> | <b>20B</b> | <b>20C</b> | <b>Sum</b> |
|----------------------|------------|------------|------------|------------|------------|------------|
| <b>614D</b>          | 611        | 221        | 5          | 0          | 0          | 837        |
| <b>614G</b>          | 7          | 0          | 885        | 716        | 340        | 1948       |
| <b>614X</b>          | 0          | 0          | 4          | 2          | 2          | 8          |
| <b>Sum</b>           | 618        | 221        | 894        | 718        | 342        | 2793       |

437 *Table S2: Mutation D614G, the mutation which increased during the pandemic and has been suggested to be*  
 438 *favoured, is mostly found in type 2 clades, and very rarely in protein 19B. Most of the cases of mutation 614D*  
 439 *correspond to clades of type 1, with only 5 cases corresponding to clade 20A.*

440

## 441 **References**

- 442 1. Organization, World Health. Coronavirus disease 2019 (COVID-19): situation report, 72. 2020.  
443 Available: <https://apps.who.int/iris/bitstream/handle/10665/331685/nCoVsitrep01Apr2020-eng.pdf>
- 444 2. Coelho MTP, Rodrigues JFM, Medina AM, Scalco P, Terribile LC, Vilela B, et al. Exponential  
445 phase of covid19 expansion is driven by airport connections. doi:10.1101/2020.04.02.20050773
- 446 3. Dong E, Du H, Gardner L. An interactive web-based dashboard to track COVID-19 in real time.  
447 Lancet Infect Dis. 2020;20: 533–534.
- 448 4. Hadfield J, Megill C, Bell SM, Huddleston J, Potter B, Callender C, et al. Nextstrain: real-time  
449 tracking of pathogen evolution. Bioinformatics. 2018;34: 4121–4123.
- 450 5. Tang X, Wu C, Li X, Song Y, Yao X, Wu X, et al. On the origin and continuing evolution of SARS-  
451 CoV-2. Natl Sci Rev. 2020;7: 1012–1023.
- 452 6. Rambaut A, Holmes EC, O’Toole Á, Hill V, McCrone JT, Ruis C, et al. A dynamic nomenclature  
453 proposal for SARS-CoV-2 lineages to assist genomic epidemiology. Nat Microbiol 2020. Preprint]  
454 July. 2020;15.
- 455 7. Brufsky A. Distinct viral clades of SARS CoV 2: Implications for modeling of viral spread. J Med  
456 Virol. 2020. doi:10.1002/jmv.25902
- 457 8. Nunthaboot N, Rungrotmongkol T, Malaisree M, Kaiyawet N, Decha P, Sompornpisut P, et al.  
458 Evolution of human receptor binding affinity of H1N1 hemagglutinins from 1918 to 2009 pandemic  
459 influenza A virus. J Chem Inf Model. 2010;50: 1410–1417.
- 460 9. Pechous RD, Sivaraman V, Stasulli NM, Goldman WE. Pneumonic Plague: The Darker Side of  
461 Yersinia pestis. Trends in Microbiology. 2016. pp. 190–197. doi:10.1016/j.tim.2015.11.008
- 462 10. Anderson RM, May RM. Coevolution of hosts and parasites. Parasitology. 1982;85 (Pt 2): 411–426.

- 463 11. Alizon S, Hurford A, Mideo N, Van Baalen M. Virulence evolution and the trade-off hypothesis:  
464 history, current state of affairs and the future. *J Evol Biol.* 2009;22: 245–259.
- 465 12. Korber B, Fischer W, Gnanakaran SG, Yoon H. Spike mutation pipeline reveals the emergence of a  
466 more transmissible form of SARS-CoV-2. *bioRxiv.* 2020. Available:  
467 <https://www.biorxiv.org/content/10.1101/2020.04.29.069054v2.abstract>
- 468 13. Korber B, Fischer WM, Gnanakaran S, Yoon H, Theiler J, Abfalterer W, et al. Tracking changes in  
469 SARS-CoV-2 Spike: evidence that D614G increases infectivity of the COVID-19 virus. *Cell.* 2020.
- 470 14. Liu Z, Xiao X, Wei X, Li J, Yang J, Tan H, et al. Composition and divergence of coronavirus spike  
471 proteins and host ACE2 receptors predict potential intermediate hosts of SARS CoV 2. *J Med*  
472 *Virol.* 2020;92: 595–601.
- 473 15. Daniel W, Nianshuang W, Kizzmekia S C, Jory A. G, Ching-Lin H, Olubukola A, et al. Cryo-EM  
474 structure of the 2019-nCoV spike in the prefusion conformation. 2020. Available:  
475 <https://semanticscholar.org/paper/92a7d979d744ca7cba34506d371c25f8df47472b>
- 476 16. Alexandra C. W, Young-jun P, M. Alejandra T, Abigail W, Andrew T M, David V. Structure,  
477 Function, and Antigenicity of the SARS-CoV-2 Spike Glycoprotein. 2020. Available:  
478 <https://semanticscholar.org/paper/96121ab9bdbff9aa26d00ff85736ae235c4a9fbf>
- 479 17. Krueger DK, Kelly SM, Lewicki DN, Ruffolo R, Gallagher TM. Variations in disparate regions of  
480 the murine coronavirus spike protein impact the initiation of membrane fusion. *J Virol.* 2001;75:  
481 2792–2802.
- 482 18. Shereen MA, Khan S, Kazmi A, Bashir N, Siddique R. COVID-19 infection: Origin, transmission,  
483 and characteristics of human coronaviruses. *J Advert Res.* 2020;24: 91–98.
- 484 19. Zhan X-Y, Zhang Y, Zhou X, Huang K, Qian Y, Leng Y, et al. Molecular Evolution of SARS-CoV-  
485 2 Structural Genes: Evidence of Positive Selection in Spike Glycoprotein. 2020. p.

- 486 2020.06.25.170688. doi:10.1101/2020.06.25.170688
- 487 20. Merow C, Urban MC. Seasonality and uncertainty in COVID-19 growth rates. medRxiv. 2020.
- 488 21. Li Q, Wu J, Nie J, Zhang L, Hao H, Liu S, et al. The Impact of Mutations in SARS-CoV-2 Spike on  
489 Viral Infectivity and Antigenicity. Cell. 2020. doi:10.1016/j.cell.2020.07.012
- 490 22. Grubaugh ND, Hanage WP, Rasmussen AL. Making Sense of Mutation: What D614G Means for the  
491 COVID-19 Pandemic Remains Unclear. Cell. 2020. pp. 794–795.
- 492 23. nextclade. Github; Available: <https://github.com/nextstrain/nextclade>
- 493 24. Friedman JH. Greedy Function Approximation: A Gradient Boosting Machine. Ann Stat. 2001;29:  
494 1189–1232.
- 495 25. Friedman JH, Popescu BE. Predictive learning via rule ensembles. Ann Appl Stat. 2008;2: 916–954.
- 496 26. Elith J, Leathwick JR, Hastie T. A working guide to boosted regression trees. J Anim Ecol. 2008;77:  
497 802–813.
- 498 27. Lowen AC, Mubareka S, Steel J, Palese P. Influenza virus transmission is dependent on relative  
499 humidity and temperature. PLoS Pathog. 2007;3: 1470–1476.
- 500 28. Paynter S. Humidity and respiratory virus transmission in tropical and temperate settings. Epidemiol  
501 Infect. 2015;143: 1110–1118.
- 502 29. Raghav S, Ghosh A, Turuk J, Kumar S, Jha A. SARS-CoV2 genome analysis of Indian isolates and  
503 molecular modelling of D614G mutated spike protein with TMPRSS2 depicted its enhanced  
504 interaction and virus .... bioRxiv. 2020. Available:  
505 <https://www.biorxiv.org/content/10.1101/2020.07.23.217430v1.abstract>
- 506 30. van Dorp L, Richard D, Tan CCS, Shaw LP, Acman M. No evidence for increased transmissibility  
507 from recurrent mutations in SARS-CoV-2. bioRxiv. 2020. Available:

- 508 <https://www.biorxiv.org/content/10.1101/2020.05.21.108506v1.abstract>
- 509 31. Ives AR, Bozzuto C. Estimating and explaining the spread of COVID-19 at the county level in the  
510 USA. medRxiv. 2020. Available:  
511 <https://www.medrxiv.org/content/10.1101/2020.06.18.20134700v3.full.pdf>
- 512 32. Hartley P, Tillett RL, Xu Y, AuCoin DP, Sevinsky JR, Gorzalski A, et al. Genomic surveillance  
513 revealed prevalence of unique SARS-CoV-2 variants bearing mutation in the RdRp gene among  
514 Nevada patients. medRxiv. 2020. doi:10.1101/2020.08.21.20178863
- 515 33. Paul D, Jani K, Kumar J, Chauhan R, Seshadri V, Lal G, et al. Phylogenomic analysis of SARS-  
516 CoV-2 genomes from western India reveals unique linked mutations.  
517 doi:10.1101/2020.07.30.228460
- 518 34. Flaxman S, Mishra S, Gandy A, Unwin HJT, Mellan TA, Coupland H, et al. Estimating the effects  
519 of non-pharmaceutical interventions on COVID-19 in Europe. *Nature*. 2020;584: 257–261.
- 520 35. Ecmwf. Copernicus Climate Change Service (C3S): ERA5: Fifth generation of ECMWF  
521 atmospheric reanalyses of the global climate. Copernicus Climate Change Service Climate Data  
522 Store (CDS), date of access. 2017.
- 523 36. Qun L, Xu-hua G, Peng W, Xiaoye W, Lei Z, Ye-qing T, et al. Early Transmission Dynamics in  
524 Wuhan, China, of Novel Coronavirus–Infected Pneumonia. 2020. Available:  
525 <https://semanticscholar.org/paper/c55e7fbc18c4816cc4e73e7877a0ca20a0577922>
- 526 37. Friedman JH, Meulman JJ. Multiple additive regression trees with application in epidemiology. *Stat*  
527 *Med*. 2003;22: 1365–1381.
- 528 38. Greenwell B, Boehmke B, Cunningham J, Developers GBM. gbm: Generalized Boosted Regression  
529 Models. 2020. Available: <https://github.com/gbm-developers/gbm>
- 530 39. Kuhn M, Johnson K. Applied predictive modeling. Springer; 2013.

- 531 40. Kuhn M. Building predictive models in R using the caret package. J Stat Softw. 2008;28: 1–26.
- 532 41. K. Gerald van den Boogaart RT-D (auth ). Analyzing Compositional Data with R. 1st ed. Springer-
- 533 Verlag Berlin Heidelberg; 2013.
